# Supplementary material
Source: publisher figshare collection journal article supplement (https://acs.figshare.com/ndownloader/files/3797155)
Supplement: Supplementary file 1 [file 3797155]

## Supporting information

### Fruit Peels as an Efficient Renewable Adsorbents for Removal of Dissolved Heavy Metals and Dyes from Water

*Ramakrishna Mallampati<sup>1</sup>, Li Xuanjun<sup>2</sup>, Avner Adin<sup>1†</sup> and Suresh Valiyaveetil<sup>2\*</sup>*

<sup>1</sup>NUS Environmental Research Institute National University of Singapore, -Lab Building, 5A Engineering Drive 1, Singapore 117411.

<sup>2</sup>Department of chemistry, National University of Singapore, 3 Science Drive 3, Singapore 117543; Email. [chmsv@nus.edu.sg](mailto:chmsv@nus.edu.sg).

†Adin is currently visiting from Hebrew University of Jerusalem, Israel

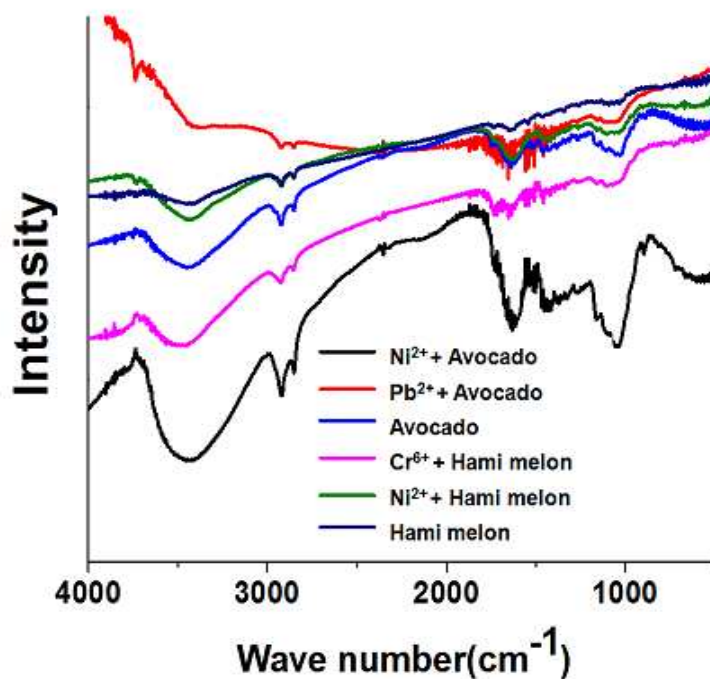

**Figure S1.** FT-IR spectra of avocado peel and hamimelon peel before and after adsorption of pollutants.

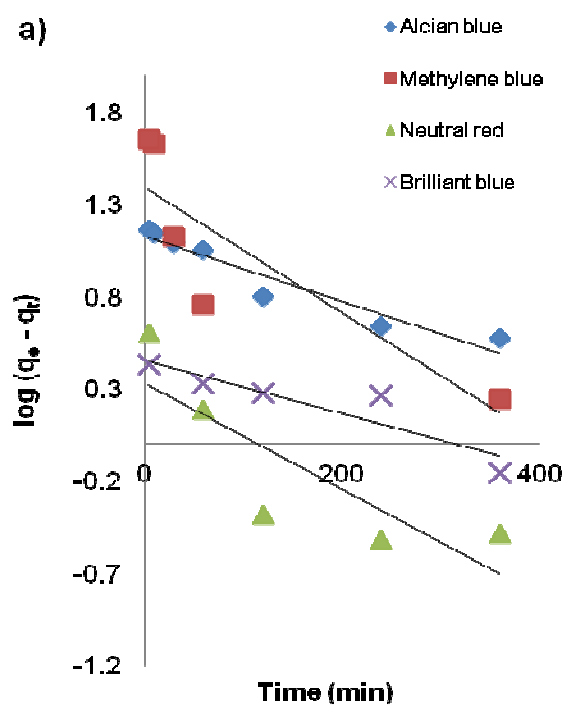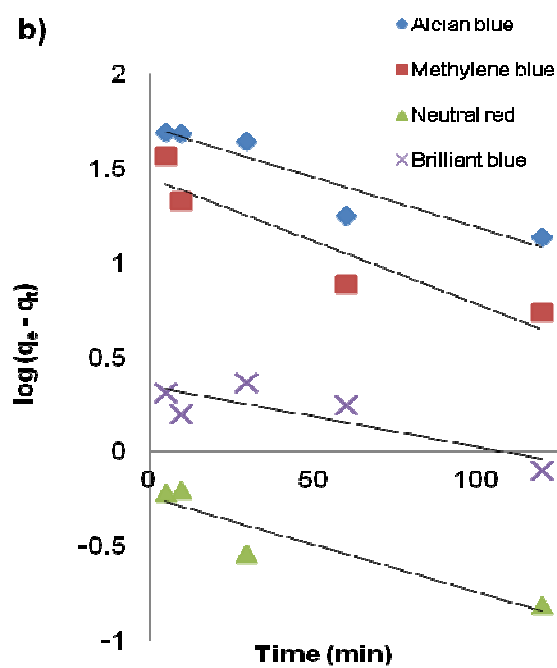

**Figure S2.** Pseudo-first order kinetics for adsorption of dyes onto hamimelon peel (a) and dragon fruit peel (b).

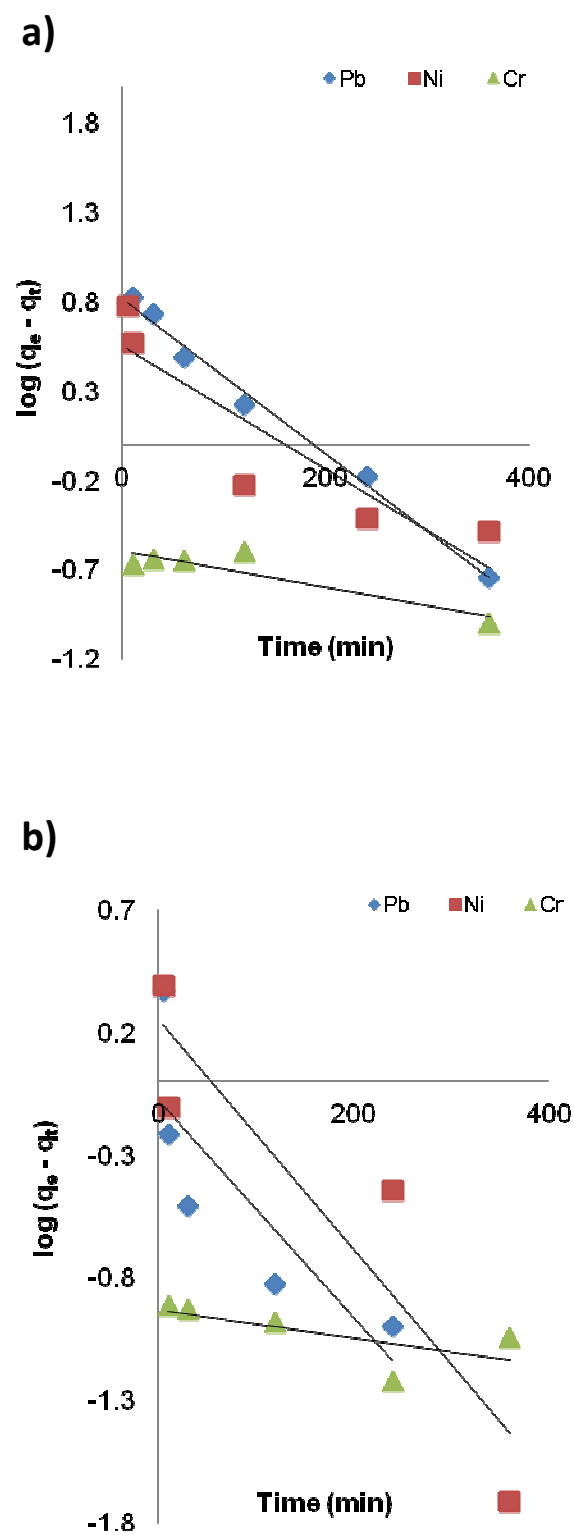

**Figure S3.** Pseudo-first order kinetics for adsorption of heavy metal ions onto hamimelon peel (a) and dragon fruit peel (b).

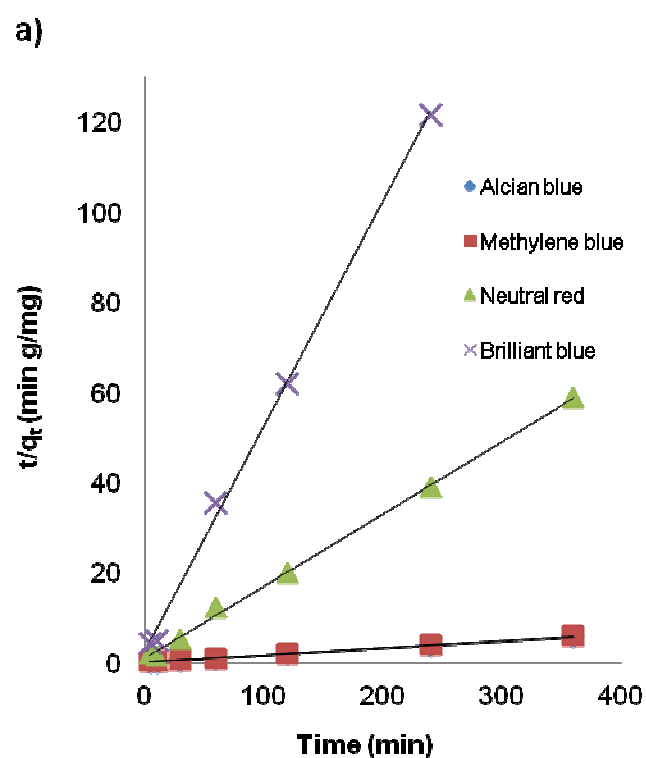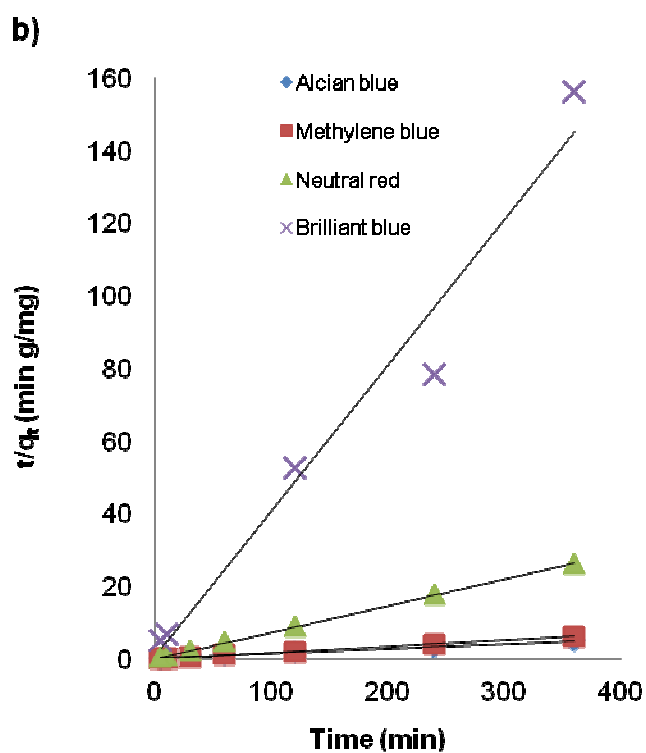

**Figure S4.** Pseudo-second order kinetics for adsorption of dyes onto hamimelon peel (a) and dragon fruit peel (b).

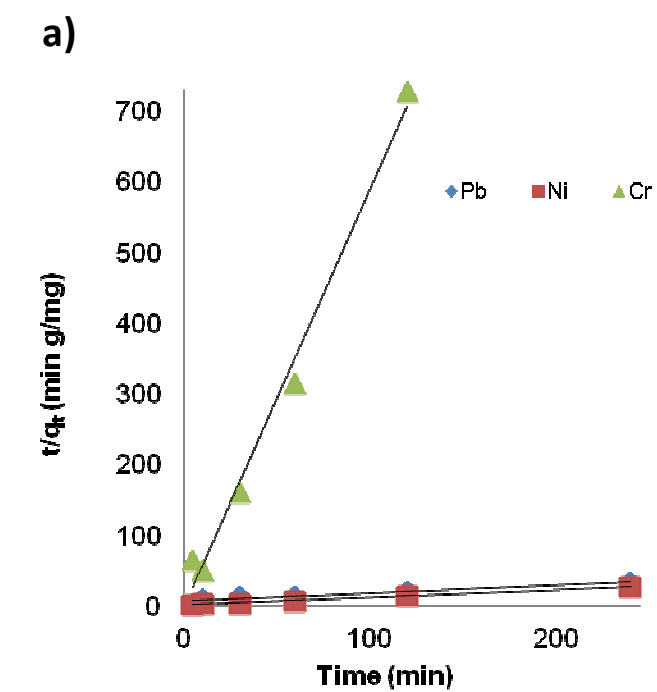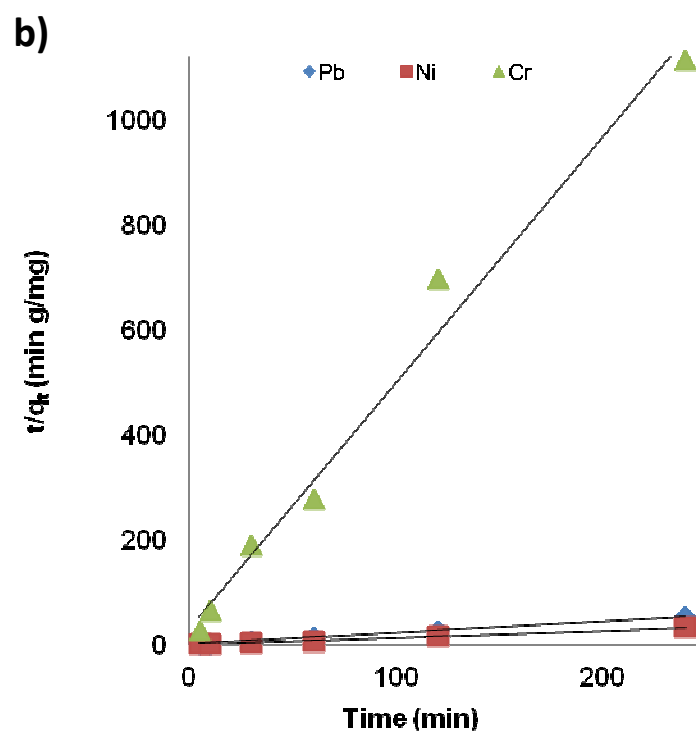

**Figure S5.** Pseudo-second order kinetics for adsorption of heavy metal ions onto hamimelon peel (a) and dragon fruit peel (b).

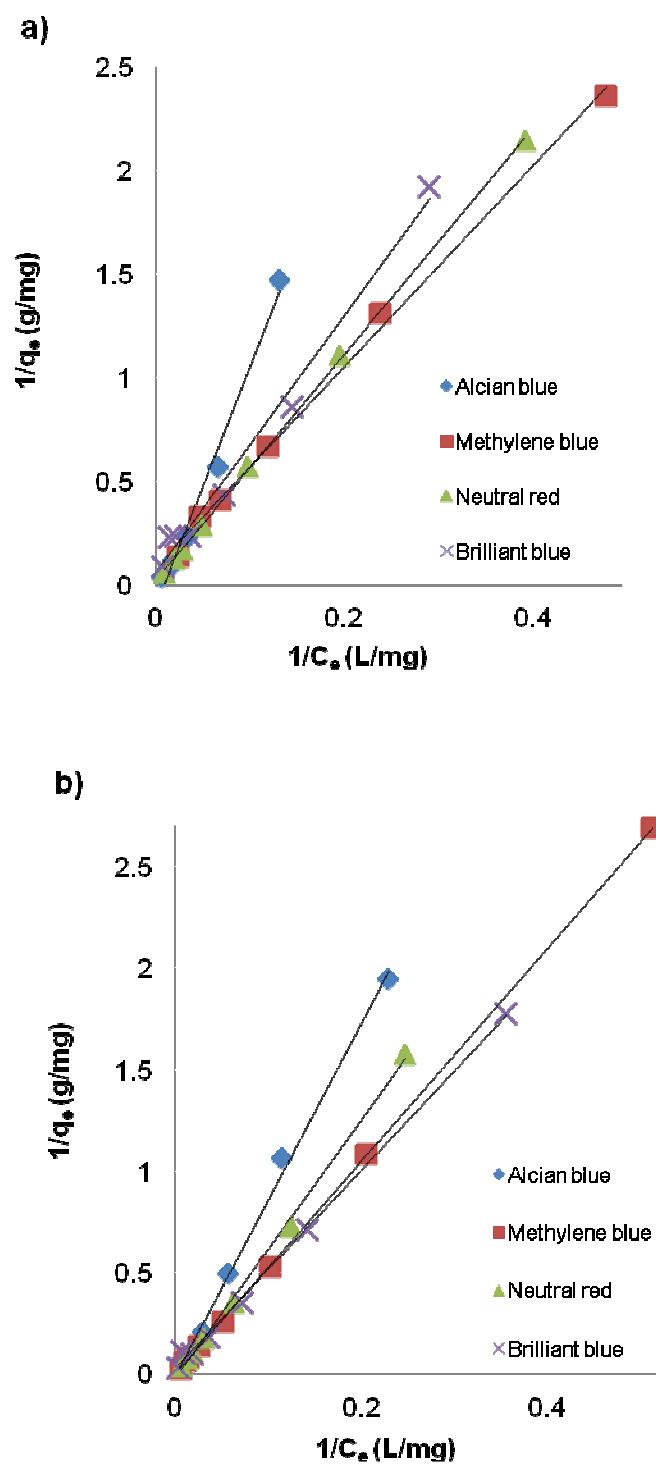

**Figure S6.** Langmuir isotherms for dyes for hamimelon peel (a) and dragon fruit peel (b).

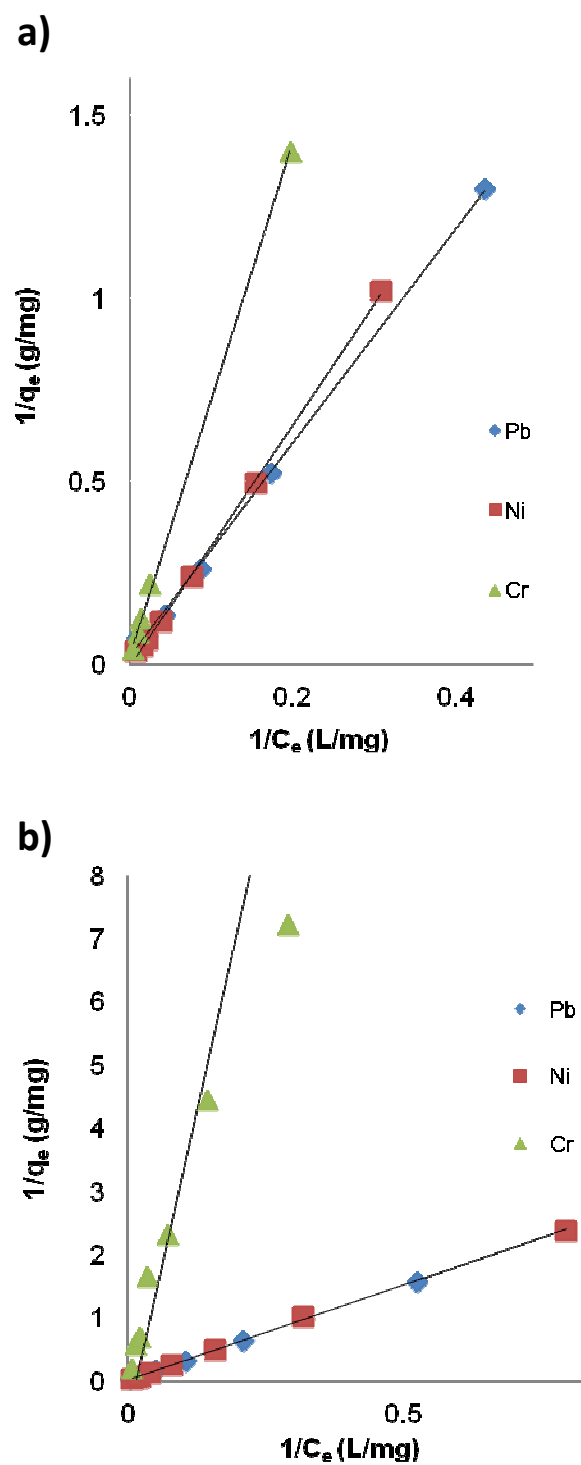

**Figure S7.** Langmuir isotherms for heavy metal ions for hamimelon peel (a) and dragon fruit peel (b).

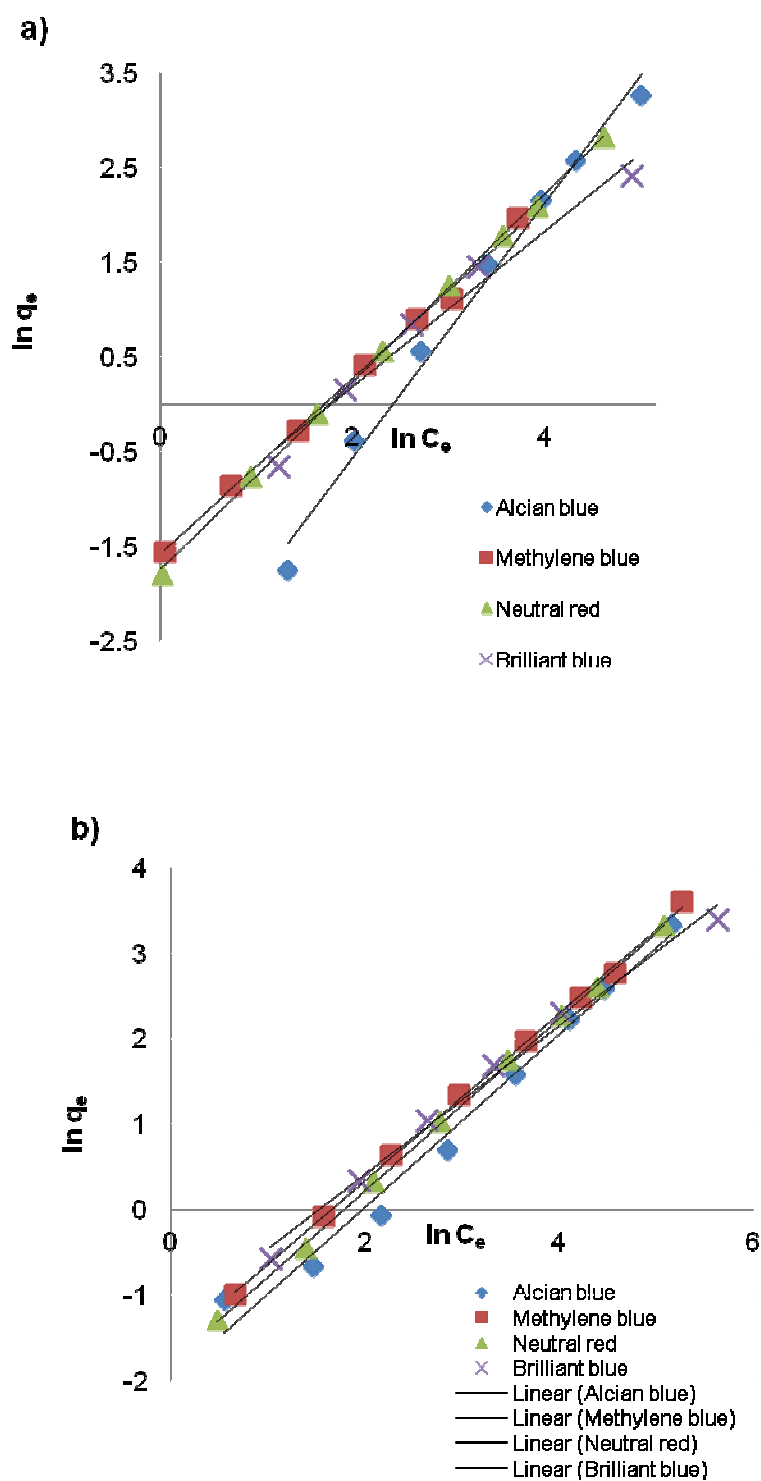

**Figure S8.** Freundlich isotherms for dyes for hamimelon peel (a) and dragon fruit peel (b).



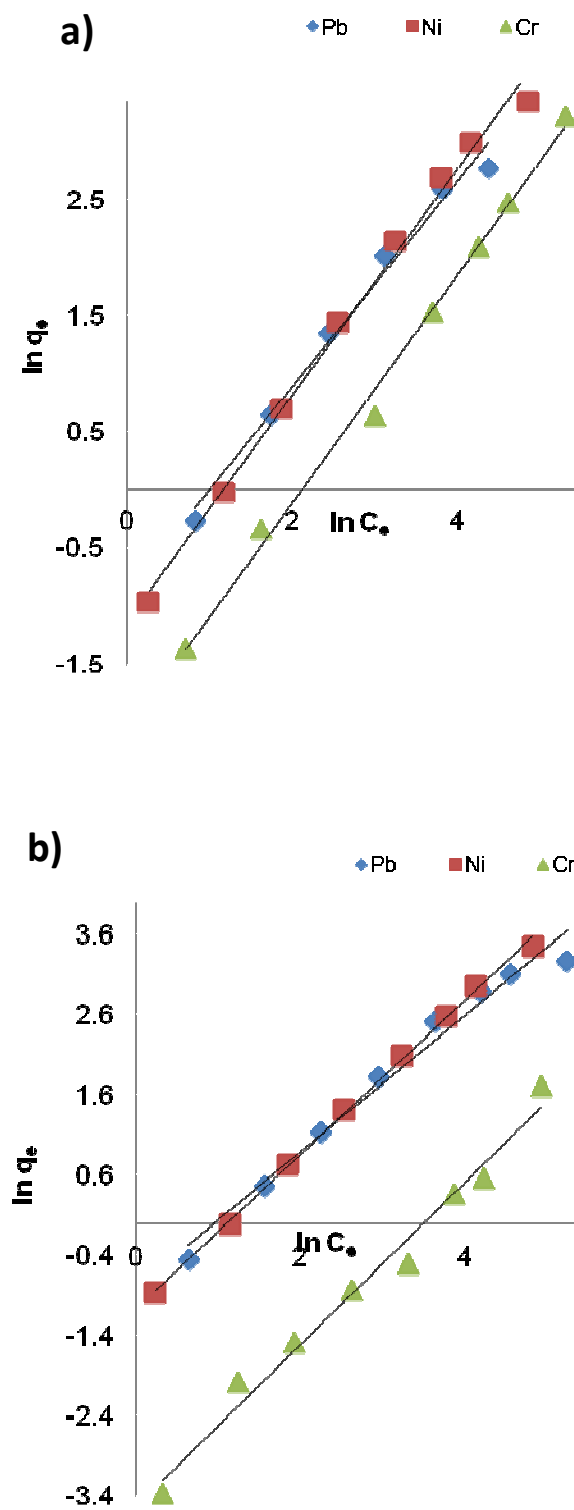

**Figure S9.** Freundlich isotherms for heavy metal ions for hamimelon peel (a) and dragon fruit peel (b).
